# Supplementary material for: Src-homology protein tyrosine phosphatase-1 agonist, SC-43, reduces liver fibrosis
Source: Sci Rep. 2017 May 11;7:1728. doi: 10.1038/s41598-017-01572-z (PMC5431996; doi:10.1038/s41598-017-01572-z)

## **Supplementary Data**

**Title:** Src-homology protein tyrosine phosphatase-1 agonist, SC-43, reduces liver fibrosis

### **Authors:**

Tung-Hung Su, Chung-Wai Shiau, Ping Jao, Nian-Jie Yang, Wei-Tien Tai, Chun-Jen Liu, Tai-Chung Tseng, Hung-Chih Yang, Chen-Hua Liu, Kai-Wen Huang, Ting-Chen Hu, Yu-Jen Huang, Yao-Ming Wu, Li-Ju Chen, Pei-Jer Chen, Ding-Shinn Chen, Kuen-Feng Chen, Jia-Horng Kao

**Figure S1. The positive correlation between SHP-1 expression and ALT.**

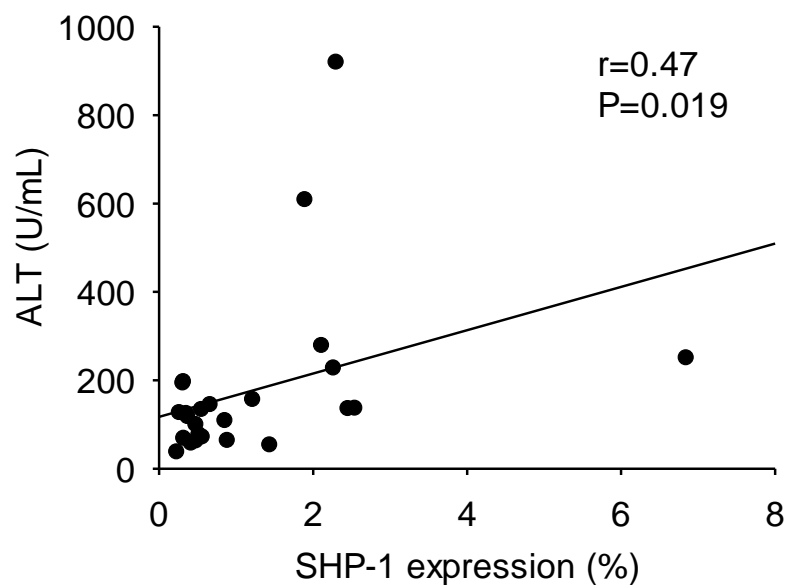

**Figure S2. SHP-1 inhibition increased liver fibrosis in CCl<sub>4</sub>-induced fibrosis mouse model.**

Sodium stibogluconate, a specific SHP-1 inhibitor, was administered during CCl<sub>4</sub> induction for 2 weeks. Representative images after sirius red staining and collagen-positive area quantification. Scale bar: 100  $\mu$ m. Columns: mean and bars: standard error. \* $P < 0.05$  compared with the vehicle group. N = 9 in each group.

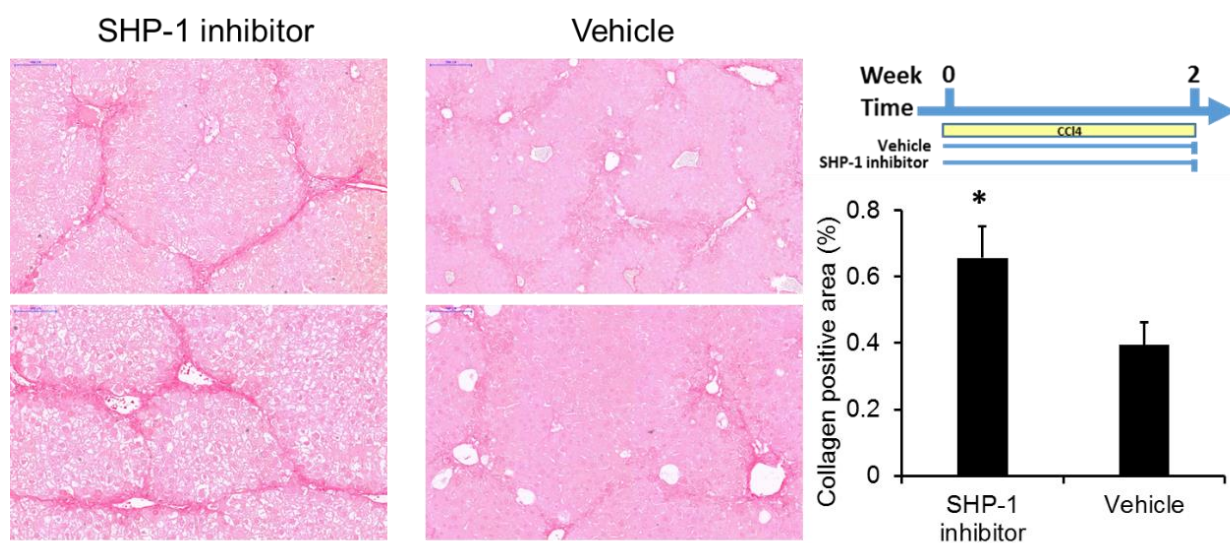

**Figure S3. SHP-1 inhibition increased liver fibrosis in bile duct ligation fibrosis mouse model.**

Sodium stibogluconate, a specific SHP-1 inhibitor, was administered after BDL for 7 days. Representative images after sirius red staining and collagen-positive area quantification. Scale bar: 100  $\mu$ m. Columns: mean and bars: standard error. N =8 in each group.

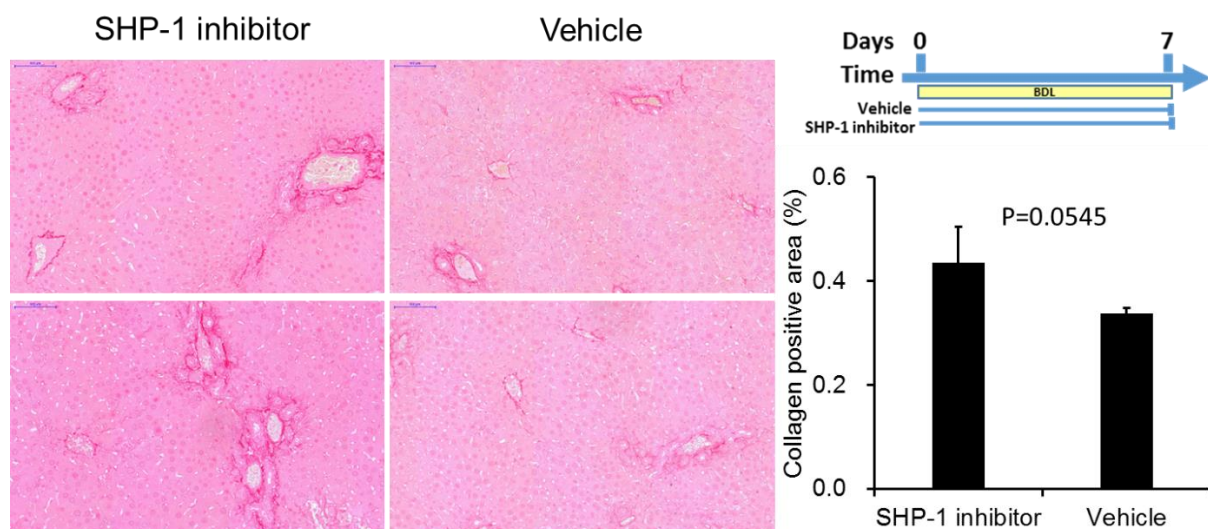

**Figure S4. SC-43 treatment reduces the  $\alpha$ -SMA expression in CCl<sub>4</sub>-induced liver fibrosis mouse model.**

Representative images after  $\alpha$ -SMA staining and quantification. Scale bar: 100  $\mu$ m. Columns: mean and bars: standard error. N=3 in each group.

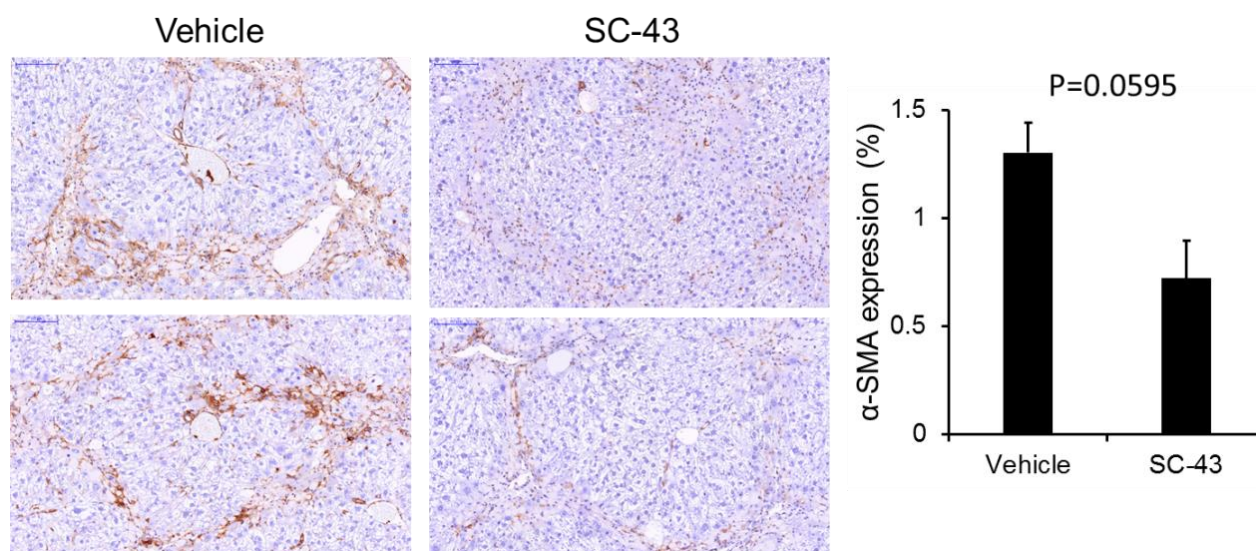

**Figure S5. SC-43 treatment increases apoptotic hepatic stellate cells in CCl<sub>4</sub>-induced liver fibrosis mouse model.**

Representative images after TUNEL staining for apoptotic cells and quantification. Scale bar: 100  $\mu$ m. Columns: mean and bars: standard error. \*P < 0.05 compared with the vehicle group. N=4-6 in each group.

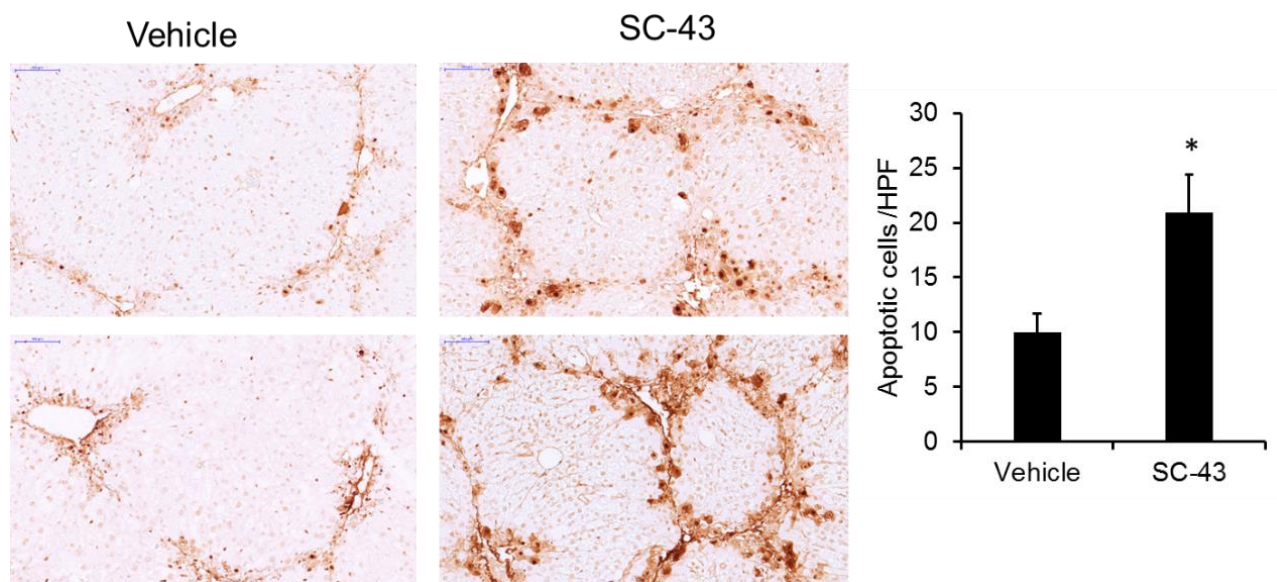

**Figure S6. The liver hydroxyproline level in bile duct ligation mouse models.**

(a) In the BDL fibrosis prevention model. (b) In the BDL fibrosis therapy model.

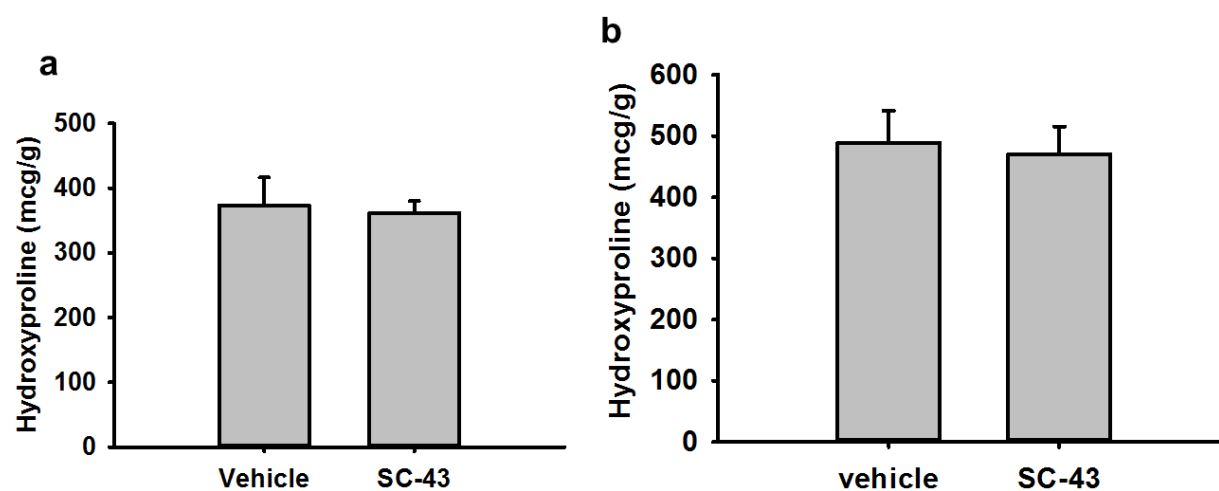

**Figure S7. The cell cycle is HSCs after SC-43 treatment.**

(a) Representative image of cell cycles in LX2 cells. (b) The increased Sub-G1 phase on LX2 and HSC-T6 cells after SC-43 treatment.

(a)

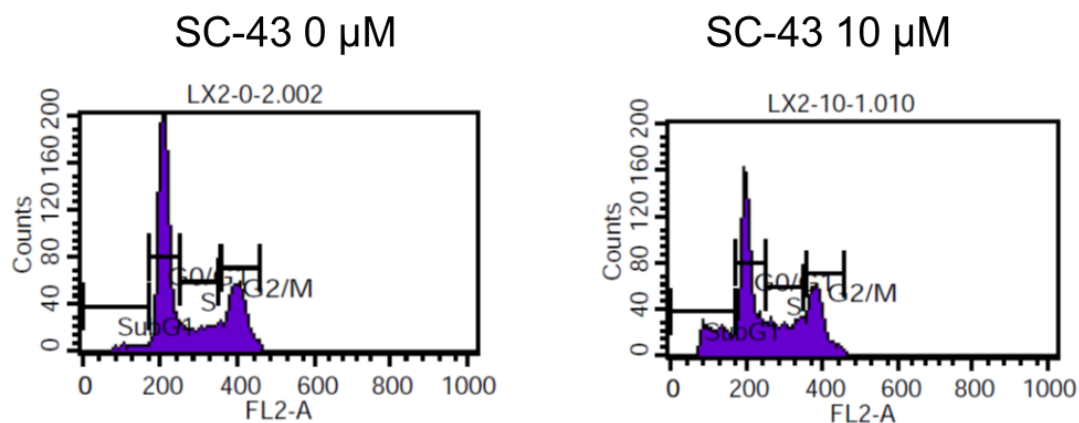

(b)

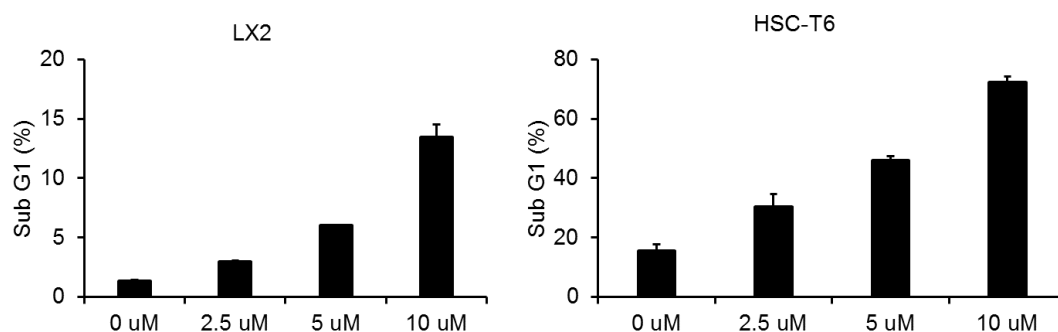

**Figure S8. SC-43 treatment downregulates phospho-STAT3 in primary mouse hepatic stellate cells**

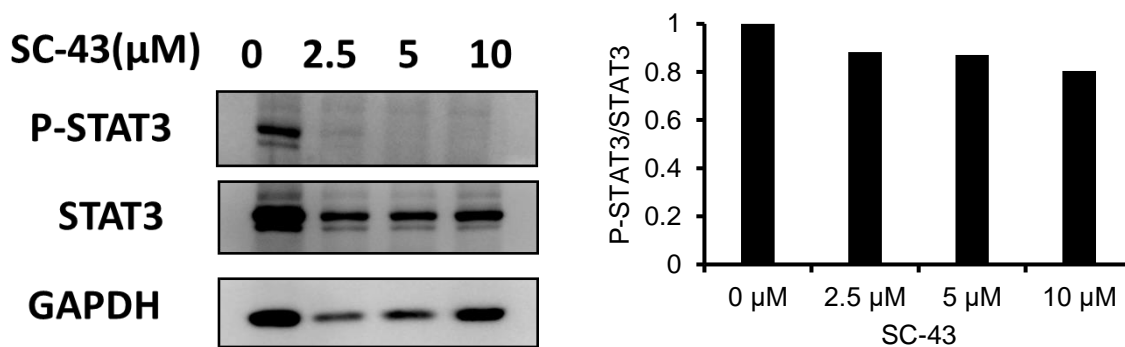

Supplement: Supplementary file 1 — Supplementary Data [file 41598_2017_1572_MOESM1_ESM.pdf]
